# Supplementary material
Source: MDPI journal article supplement (https://www.mdpi.com/2673-6209/2/3/27)
Supplement: s1 [file s1]

# Soft Elastomers Based on the Epoxy–Amine Chemistry and Their Use for the Design of Adsorbent Amphiphilic Magnetic Nanocomposites

Magda Lorena Arciniegas Vaca, Jimena S. Gonzalez\* and Cristina E. Hoppe

Institute of Materials Science and Technology (INTEMA), University of Mar del Plata and National Research Council (CONICET), Colon 10890, Mar del Plata CP: 7600, Argentina

\*Correspondence: jimena.gonzalez@fi.mdp.edu.ar

## SUPPORTING INFORMATION

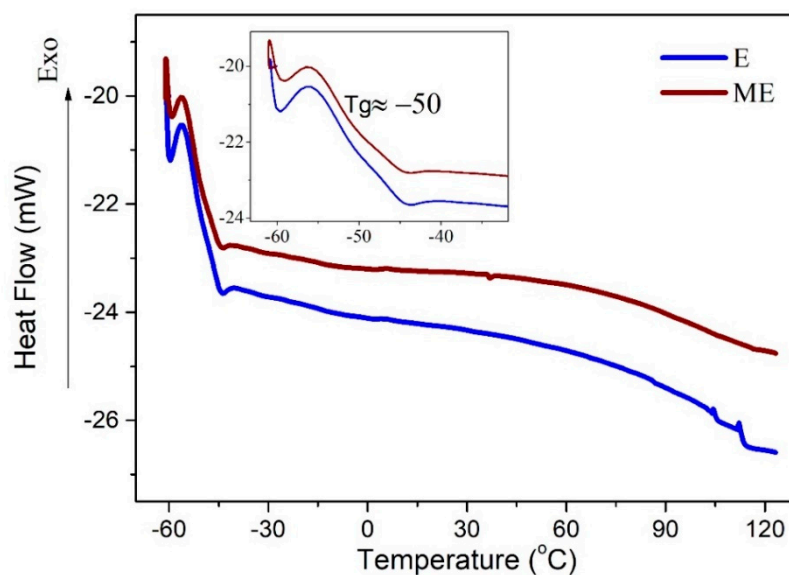

**Figure S1:** DSC scan for the E and the ME obtained

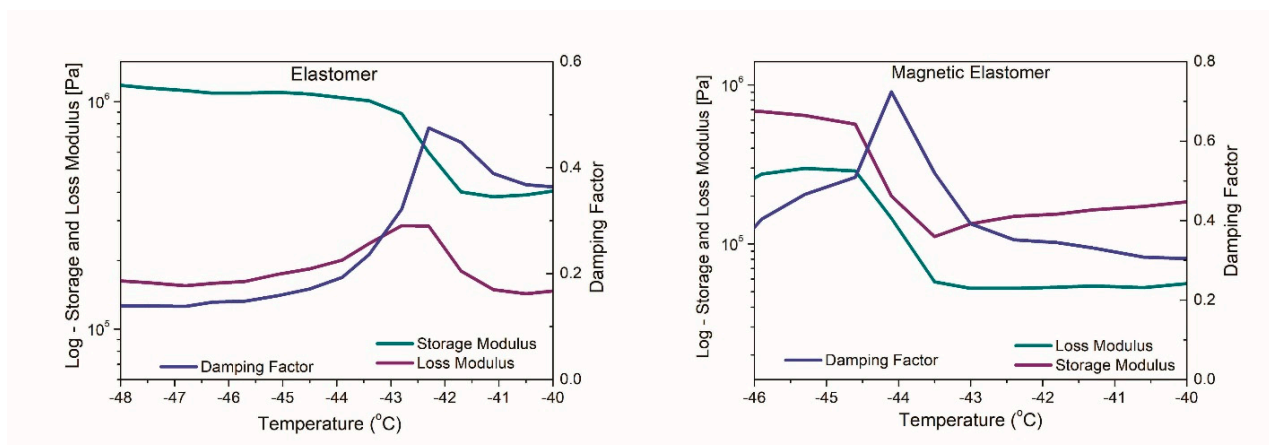

**Figure S2:**  $G'$ ,  $G''$  and  $\tan\delta$  curves obtained for the E and the ME.

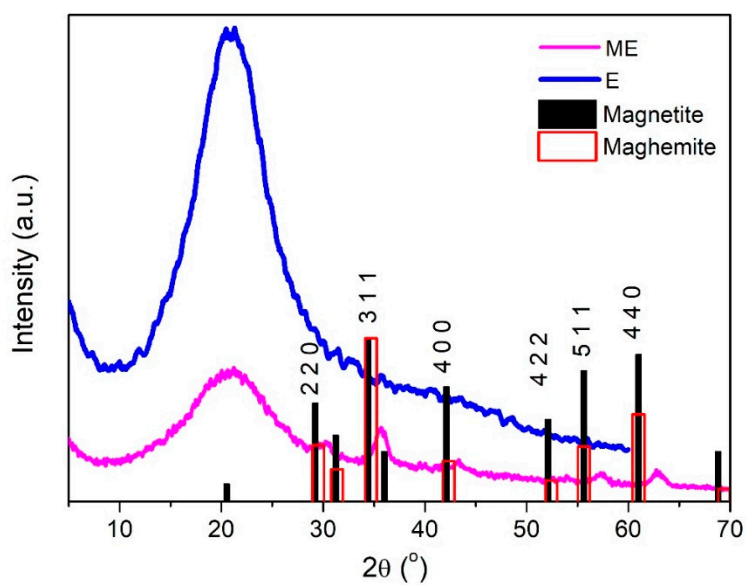

**Figure S3:** X-ray diagrams for E, ME and Magnetite/Maghemite phases.
